# Supplementary material for: Application of High Voltage Electrical Discharge Treatment to Improve Wheat Germination and Early Growth under Drought and Salinity Conditions
Source: MDPI journal article supplement (doi:10.3390/plants10102137), 2021-10-09
Supplement: s1 [file s1]

## Supplementary Materials

**Table S1.** Analysis variance of germination (G), germination index (GI), shoot length (S), root length (R) and drought tolerance index (SL\_DTI, shoot; RL\_DTI, root) under drought stress. High-voltage electrical discharge (HVED) pretreatment (P). Number beside each variable represent the day of treatment.

| Source of variation                            | Df       | G1      | G2      | G3      | G4     | GI      | S2     | S3      | S5       | R        | SL_DTI   | RL_DTI  |
|------------------------------------------------|----------|---------|---------|---------|--------|---------|--------|---------|----------|----------|----------|---------|
| <b>Genotype (G)</b>                            | 1        | 18.75*  | 1564.1* | 1220.1* | 981*   | 334.1*  | 42*    | 221*    | 3132.9*  | 2356.2*  | 330.4*   | 500*    |
| <b>Treatment (T)</b>                           | 3        | 632.1*  | 1503.8* | 473.4*  | 455.8* | 1740.8* | 124.9* | 1054.8* | 17603.3* | 15912.5* | 17684.4* | 8143.5* |
| <b>Pretreatment (P)</b>                        | 1        | 1064.1* | 1900.1* | 176.3*  | 93.5*  | 2681.6* | 308*   | 4730.6* | 1452*    | 2941.2*  | 155.4*   | 1036.8* |
| <b>Genotype*Treatment (G*T)</b>                | 3        | 17.9*   | 113.6*  | 393.1*  | 368.1* | 145.4*  | 8.7*   | 60.1*   | 388.3*   | 863.9*   | 848.2*   | 1072.9* |
| <b>Genotype*Pretreatment (G*P)</b>             | 1        | 6.8*    | 432*    | 200.1*  | 82.7*  | 177.4*  | 4.9*   | 396.8*  | 10ns     | 4161.6*  | 178.4*   | 1937.9* |
| <b>Treatment*Pretreatment (T*P)</b>            | 3        | 160.3*  | 95.6*   | 15.2*   | 17.8*  | 102.2*  | 24.8*  | 53.7*   | 75.8*    | 182.7*   | 223.4*   | 110.7*  |
| <b>Genotype*Treatment*Pretreatment (G*T*P)</b> | 3        | 33.6*   | 88.7*   | 20.6*   | 14.1*  | 31.1*   | 5.4*   | 38.1*   | 147.6*   | 269.6*   | 129.1*   | 190.9*  |
| Error                                          | 144, 108 | 1.1     | 1       | 1.0     | 1.0    | 1.2     | 0.3    | 1       | 3.5      | 5.6      | 6.5      | 7.2     |

\* significant at  $P \leq 0.05$ ; ns-not significant  
32 (G1-G4, GI), 144(S2,S3,S5,R), 108(SL\_DT, RL\_DT)

**Table S2.** Factor loadings of germination, morphological parameters and drought tolerance index under drought. Germination percentage (G), germination index (GI), shoot (S) and root (R) length, drought tolerance index of shoot (SL\_DT) and root (RL\_DT). Number beside each variable represent the day of treatment.

| Variable                         | PC1   | PC2   |
|----------------------------------|-------|-------|
| <b>G1</b>                        | -0.80 | -0.12 |
| <b>G2</b>                        | -0.92 | -0.25 |
| <b>G3</b>                        | -0.77 | -0.39 |
| <b>G4</b>                        | -0.79 | -0.34 |
| <b>S2</b>                        | -0.82 | -0.25 |
| <b>S3</b>                        | -0.90 | -0.22 |
| <b>S5</b>                        | -0.74 | 0.62  |
| <b>R</b>                         | -0.82 | 0.40  |
| <b>GI</b>                        | -0.96 | -0.26 |
| <b>SL_DT</b>                     | -0.72 | 0.58  |
| <b>RL_DT</b>                     | -0.84 | 0.40  |
| Explained variance (eigenvalue)  | 7.58  | 1.57  |
| Proportion of total variance (%) | 68.93 | 14.32 |
| Cumulative variance (%)          | 68.93 | 83.25 |
| <i>PC (principal component)</i>  |       |       |

**Table S3.** Analysis variance of germination (G), shoot length (S) and root length (R) under salt stress. High-voltage electrical discharge (HVED) pretreatment (P). Number beside each variable represent the day of treatment.

| Source of variation                     | Df      | G1     | G2      | G3      | G4      | GI      | S2     | S3      | S5       | R        |
|-----------------------------------------|---------|--------|---------|---------|---------|---------|--------|---------|----------|----------|
| Genotype (G)                            | 1       | 18.8*  | 10.1*   | 52.1*   | 50*     | 2.1*    | 1.2*   | 16*     | 2066.4*  | 573.8*   |
| Treatment (T)                           | 3       | 867.4* | 3746.9* | 4104.7* | 4157.1* | 4074*   | 329.7* | 3818.3* | 55523.7* | 82054.4* |
| Pretreatment (P)                        | 1       | 396.8* | 3104.1* | 3267*   | 2745.2* | 2902.7* | 60*    | 1651.2* | 3339.8*  | 6262.5*  |
| Genotype*Treatment (G*T)                | 3       | 21.6*  | 94.3*   | 58.1*   | 90.6*   | 11.8*   | 1.01*  | 8.9*    | 774.5*   | 328.3*   |
| Genotype*Pretreatment (G*P)             | 1       | 16.3*  | 0.1ns   | 10.1*   | 50*     | 16.1*   | 0.4    | 70.2*   | 1.8ns    | 43.1*    |
| Treatment*Pretreatment (T*P)            | 3       | 331.1* | 644.8*  | 514.7*  | 442*    | 267.2*  | 16.7*  | 296.5*  | 501.9*   | 1487.4*  |
| Genotype*Treatment*Pretreatment (G*T*P) | 3       | 19.1*  | 16.9*   | 75.4*   | 71*     | 29.5*   | 0.3*   | 82.3*   | 24.5*    | 45.5*    |
| Error                                   | 32, 144 | 0.4    | 1       | 1.2     | 1.1     | 0.8     | 0.1    | 0.2     | 1.0      | 8.6      |

\* significant at  $P \leq 0.05$ ; ns-not significant  
32(G1-G4), 144(S2, S3, S4, R)

**Table S4.** Analysis variance of salt tolerance index of germination during four days (STI\_G), salt tolerance index of shoot (STI\_S) and root (STI\_R) under salt stress. High-voltage electrical discharge (HVED) pre-treatment (P). Number beside each variable represent the day of treatment.

| Source of variation                     | Df      | STI_G1 | STI_G2 | STI_G3 | STI_G4 | STI_S2 | STI_S3 | STI_S5 | STI_R  |
|-----------------------------------------|---------|--------|--------|--------|--------|--------|--------|--------|--------|
| Genotype (G)                            | 1       | 0.00*  | 0.06*  | 0.00*  | 0.00*  | 0.01*  | 0.00*  | 0.12*  | 0.02*  |
| Treatment (T)                           | 2       | 0.00*  | 0.84*  | 1.16*  | 1.46*  | 0.54*  | 1.76*  | 2.18*  | 2.25*  |
| Pretreatment (P)                        | 1       | 0.00*  | 1.34*  | 1.79*  | 1.54*  | 1.23*  | 0.43*  | 0.33*  | 0.57*  |
| Genotype*Treatment (G*T)                | 2       | 0.00*  | 0.04*  | 0.04*  | 0.07*  | 0.00*  | 0.02*  | 0.11*  | 0.03*  |
| Genotype*Pretreatment (G*P)             | 1       | 0.00*  | 0.00ns | 0.00*  | 0.03*  | 0.01*  | 0.08*  | 0.00*  | 0.00*  |
| Treatment*Pretreatment (T*P)            | 2       | 0.00*  | 0.38*  | 0.13*  | 0.11*  | 0.54*  | 0.10*  | 0.09*  | 0.17*  |
| Genotype*Treatment*Pretreatment (G*T*P) | 2       | 0.00*  | 0.01*  | 0.05*  | 0.04*  | 0.01*  | 0.05*  | 0.00*  | 0.00ns |
| Error                                   | 24, 108 | 0.00   | 0.00   | 0.00   | 0.00   | 0.00   | 0.00   | 0.00   | 0.00   |

\* significant at  $P \leq 0.05$ ; ns-not significant

24 (STI\_G1- STI\_G4), 108 (STI\_S2, STI\_S3, STI\_S5, STI\_R)

**Table S5.** Factor loadings of germination, morphological parameters and salt tolerance index under salt stress. Germination percentage (G), germination index (GI), shoot (S) and root (R) length, salt tolerance index of shoot (STI\_S), root (STI\_R) and germination (STI\_G). Number beside each variable represent the day of treatment.

| Variable                         | PC1    | PC2    |
|----------------------------------|--------|--------|
| G1                               | -0.870 | -0.456 |
| G2                               | -0.966 | -0.219 |
| G3                               | -0.948 | 0.100  |
| G4                               | -0.938 | 0.262  |
| GI                               | -0.980 | -0.063 |
| S2                               | -0.906 | -0.405 |
| S3                               | -0.984 | -0.111 |
| S5                               | -0.915 | 0.306  |
| R                                | -0.938 | 0.322  |
| STI_S2                           | -0.926 | -0.334 |
| STI_S3                           | -0.943 | 0.105  |
| STI_S5                           | -0.907 | 0.335  |
| STI_R5                           | -0.929 | 0.340  |
| STI_G1                           | -0.842 | -0.477 |
| STI_G2                           | -0.971 | -0.156 |
| STI_G3                           | -0.951 | 0.115  |
| STI_G4                           | -0.939 | 0.274  |
| Explained variance (eigenvalue)  | 14.808 | 1.403  |
| Proportion of total variance (%) | 87.105 | 8.253  |
| Cumulative variance (%)          | 87.105 | 95.358 |

PC1 (principal component 1); PC2 (principal component 2)
